# Supplementary material
Source: PubMed Central journal article supplement (PMC3697461)
Supplement: EC.00359-12_zek999094131so9.pdf [file EC.00359-12_zek999094131so9.pdf]

**Table S1. Oligonucleotides used in this study.**

| <i>Primer</i>       | <i>Sequence 5'→3'*</i>                                                                              |
|---------------------|-----------------------------------------------------------------------------------------------------|
| VPS21ORFF           | TCAGGATCCAGTCAACATCCAGCCCCGCA                                                                       |
| VPS21ORFR-MLUI      | TCATCAACGCGTATTACCTTAACTTCAGTCTCC                                                                   |
| VPS21DETR           | GCAACATGTGCTTCTTGGAGC                                                                               |
| YPT52AMPF           | TCAGGATCCGAGCTCTGTAGATCTGTGCACGTGACC                                                                |
| YPT52AMPR           | TCAGGATCCGGTACCGCTGAAAAAGTTGGTTCTGCC                                                                |
| YPT52AMPF2          | TCAGGATCCGAGCTCAATCTTTACAACCATTGTTTCG                                                               |
| YPT52DETF           | GAAGAGCTTTACCTGTGGACG                                                                               |
| YPT52DETR           | TTCTTGACAAAACGGTGTACG                                                                               |
| YPT52DETR2          | GTTGCTTTGATTTACTTGACC                                                                               |
| YPT52SEQF           | TATATTGTATACCTTCACCTC                                                                               |
| YPT52DISF           | TTTATCTTAACTTGTGTAATATATTGTATATGTATACCTTCACCTCATCTATTTATTCCAAGT<br>TAAATTTATTTTCGTGGAATTGTGAGCGGATA |
| YPT52DISR           | CTTTGATCAAGTAAAAATAGAAGCTCGAATAATGATTAATGAATAATAATAACTATATCA<br>AATTCTAGGTTTTCCCAGTCACGACGTT        |
| YPT52ORFR-MLUI      | TCATCAACGCGTTCAAGTAAAAATAGAAGCTCG                                                                   |
| YPT53DISF           | AAAAAAAGCGAGTAAGAAAACTGATACAGTGTTAATTTGCATTAGAATCAAATAGTGCTA<br>TTAAATCACAGTGGAATTGTGAGCGGATA       |
| YPT53DISR           | TTAACAGCAATATGAGTTAGATGTCTGTCTCGTACGTAGCATGTTTCCTATTTGATCAGAAGT<br>ATCACGAGGTTTTCCCAGTCACGACGTT     |
| YPT53AMPF           | TCAGGATCCGAGCTCGAAATCTCAGTATACGAAGGG                                                                |
| YPT53AMPR           | TCAGGATCCGGTACCACTTTTCTGACATGACAGTGG                                                                |
| YPT53DETF           | CAGTTCAAAAGAAGGCACAGG                                                                               |
| YPT53DETF2          | ATAGAGATTTCGATTGGTAGGG                                                                              |
| YPT53DETR2          | GTTAGATGTCTGTCTCGTACG                                                                               |
| YPT53SEQF           | TGCATTAGAATCAAATAGTGC                                                                               |
| YPT53ORFF-<br>BAMHI | TCATCAGGATCCAAATAGTGCTATTAAATCACA                                                                   |
| YPT53ORFF-CLAI      | TCATCAATCGATCAAATAGTGCTATTAAATCAC                                                                   |
| YPT53ORFR-PSTI      | TCATCACTGCAGCAATGATTCAATTCCTGTGCC                                                                   |
| YPT53ORFR-EAGI      | TCATCACGGCCGGATTTGTAATGATGATAAAGG                                                                   |
| YPT53ORFR-MLUI      | TCATCAACGCGTGATTTGTAATGATGATAAAGG                                                                   |
| YPT52EAGF           | TCCAAGTTAAATTTATTTTCCGGCCGTCGAACAAACAATCTAACCAACG                                                   |
| YPT52EAGR           | CGTTGGTTAGATTGTTTGTTCGACGGCCGGAAAAATAAATTTAACTTGGA                                                  |
| YPT53EAGF           | CAAATAGTGCTATTAAATCACACGGCCGCTGGAAACATCTCACTCATCAA                                                  |
| YPT53EAGR           | TTGATGAGTGAGATGTTTCCAGCGGCCGTGTGATTTAATAGCACTATTTG                                                  |
| YPT52S26NF          | GGAGAAAAGTGCAGTTGGTAAAAATCTATCGTACACCGTTTTGTG                                                       |
| YPT52S26NR          | GACAAAACGGTGTACGATAGAATTTTTACCAACTGCACTTTCTCC                                                       |
| YPT52Q73LF          | GAAATATGGGATACTGCAGGACTTGAGCGTTACAAGTCATTGGC                                                        |
| YPT52Q73LR          | GCCAATGACTTGTAACGCTCAAGTCCTGCAGTATCCCATATTT                                                         |
| YPT53T27NF          | GGAGATTCTTCCGTGGGAAAAAATTCGCTTGACACAGATTAC                                                          |
| YPT53T27NR          | GTGAATCTGTGTACAAGCGAATTTTTTCCACGGAAGAATCTCC                                                         |
| YPT53Q75LF          | GATATGGGACACAGCAGGCCTAGAAAGGTACCGTTCATTG                                                            |
| YPT53Q75LR          | CAATGAACGGTACCTTTCTAGGCCTGCTGTGTCCCATATC                                                            |
| VPS21S24NF          | GGGAGAAGCTGCAGTAGGAAAGAATTCGTTGGTGTTGCGATTTGTGTCC                                                   |
| VPS21S24NR          | GGACACAAATCGCAACACCAACGAATTCTTTCTACTGCAGCTTCTCCC                                                    |
| VPS21Q69LF          | GAAATCTGGGACACTGCTGGGTTAGAGCGTTTTGCTTCTCTTGCC                                                       |
| VPS21Q69LR          | GGCAAGAGAAGCAAAACGCTCTAACCCAGCAGTGTCCCAGATTTC                                                       |
| VPS21SEQF           | AATACTAGTAGTATCACCATC                                                                               |
| YPT72T24NF          | AGATTCTGGTGTTGGTAAAAATCACTTATGCAACAATTTG                                                            |
| YPT72T24NR          | CAAATTGTTGCATAAGTGAATTTTTACCAACACCAGAATCT                                                           |
| YPT72Q70LF          | CAAATCTGGGATACCGCTGGTTTAGAAAGATTTCAAAGTTTAGG                                                        |

|                  |                                                                |
|------------------|----------------------------------------------------------------|
| YPT72Q70LR       | CCTAAACTTTGAAATCTTTCTAAACCAGCGGTATCCCAGATTTG                   |
| YPT72SEQF        | GAAGATAATTA AAAAGGCTGAC                                        |
| APS3DISF         | AATGATGGTCTTCCGAGACTAATGAAATTCTATACCAAAGTCGATATT               |
| APS3DISR         | CCAACACAGAAATTGCTCTTGCTGTGGAATTGTGAGCGGATA                     |
| APS3AMPF2        | TATACTATTTTTGCATAATTCATTTCTGATTTATCGCTTTTACCTACCC              |
| APS3AMPR         | CAGAACCCCTCTATCTCGAGACTTTCCCAGTCACGACGTT                       |
| APS3DETF2        | TCATCAGAGCTCCTTTGCACCAACAATGGGGGC                              |
| APS3DETR2        | TCATCAGGATCCAGGAAGCAGAAAGGTTGATGC                              |
| APS3FRAGF        | CAAGTGCACCTGTTGATATCTAC                                        |
| APS3FRAGR2       | GTACTTCCATTGGAGTTGACG                                          |
| ACT1PF           | TCAGTCGACTAATCTACTAGATCAGCACAAAGAGTG                           |
| ACT1PF-BAMHI     | TCAACGCGTGGTGTGATCACCATCCCGCC                                  |
| ACT1PR2          | TCATCAGGTACCCAGCCTCGTTTATAAACTTAGTC                            |
| ADH1-3'UTRF      | TCAGGATCCCCAGCCTCGTTTATAATAAACTTAGTC                           |
| ADH1-3'UTRR      | TCATCAGAGCTCTCAGTCGACTTTGAATGATTATATTTTTTAATATTAATATCGAG       |
| ADH1-3'UTRR-APAI | TCATCAGTCGACGGTGGTATCGATGGTGGTCGGCCGGTGGTACGCGTGCATGCTAAGCAAAT |
| ARG4DETF         | AGCTAAATTATATACG                                               |
| ARG4DET2         | TCATCAGAGCTCGAAAACTTGAAACTTGAAAACACC                           |
| HIS1F1268        | TCATCAGGGCCCATCAATGCCAGAGATCAAACC                              |
| PGUR             | ATCAATTAACACAGAGATACC                                          |
| URA3INTF         | CCGAGCTTGGCGTAATCATGG                                          |
| URA3INTR         | CCGCTACTGTCTCTACTTTG                                           |
| GFPEAGF          | GAATACTCAAGCTATGCATCC                                          |
| GFPEAGR          | TTAGTGTTACGAATCAATGGC                                          |
| GFPSALIF         | CAATTATAAATGTGAAGGGGG                                          |
| GFPSEQF          | TCACGGCCGATGTCTAAAGGTGAAGAATTATTC                              |
| GFPDETR2         | TCACGGCCGTTTGTACAATTCATCCATACC                                 |
| MCHORFF          | TCAGTCGACATGTCTAAAGGTGAAGAATTATTC                              |
| MCHORFR          | TACTTATCCACTCAATATGCC                                          |
| LUXINTDETF       | AACCAAAATTGGGACAACACC                                          |
| LUXINTDETR       | TCAGTCGACCGGCCGATGGTTTCAAAAGGTGAAGAAG                          |
| MLT1GFPP         | TCACGGCCGACCAACCACTTTATATAATTCATCCATACCACC                     |
| MLT1GFPR         | CTGACCTTTAGTCTTTCCTGC                                          |
| MLT1DETF         | CAGTAGTACTTGTTGTTGTATCG                                        |
| TETOAMPF         | ACCTCAAAACTTGTTGAAGAACAAAGACAGTATTTTCTACTCTCTTG                |
| TETOAMPR         | CCAAAGAAGGTGGATACATAGATGGTGGTGGTTCTAAAGGTGAAGA                 |
| UME6ORFF-SalI    | ATTATT                                                         |
| UME6ORFR-MluI    | TGTAAACTAAAAAATATTATTGTATAAATAAAAAAATCACTATAT                  |
| HWP1DETF         | GAATATATATCGCACCGATATATATCTAGAAGGACCACCTTTGATT                 |
| HWP1DETR         | GATCTTAGTGTTAGATAGTGG                                          |
| ACT1DETF         | TCAGGTACCTGGACTTCTTCGCCAGAGG                                   |
| ACT1DETR         | TCAGTCGACTTTTCTGAGATAAAGCTGTTTTT                               |
|                  | TCATCAGTCGACGTATAAATGATTACCCATATGG                             |
|                  | TCAACGCGTAATTCTTAATTCTTAAGTTAGCC                               |
|                  | GACTCCAGCTGGTTCACAACC                                          |
|                  | ATACCAATAATAGCAGCACCG                                          |
|                  | TTGGCTGGTAGAGACTTGACC                                          |
|                  | GTGGTGAACAATGGATGGACC                                          |

\* Engineered restriction enzyme sites are underlined. Glycine encoding linkers are italicized.

**Table S2. Percent identity\* and similarity between *S. cerevisiae* and *C. albicans* endosomal GTPases.**

|          | ScVps21p   | ScYpt52p   | ScYpt53p   | CaVps21p   | CaYpt52p   | CaYpt53p |
|----------|------------|------------|------------|------------|------------|----------|
| ScVps21p | 100        |            |            |            |            |          |
| ScYpt52p | 46.4(62.8) | 100        |            |            |            |          |
| ScYpt53p | 54.3(70.6) | 43.8(57.8) | 100        |            |            |          |
| CaVps21p | 66.8(78.2) | 45.7(59.1) | 50.4(67.2) | 100        |            |          |
| CaYpt52p | 48.9(63.3) | 48.6(60.1) | 43.4(58.3) | 48.1(59.7) | 100        |          |
| CaYpt53p | 37.6(56.0) | 33.9(51.0) | 34.6(53.0) | 37.3(53.4) | 35.1(50.4) | 100      |

\* Protein sequences were aligned by using the EMBOSS pairwise align algorithm (<http://www.ebi.ac.uk/emboss/>).

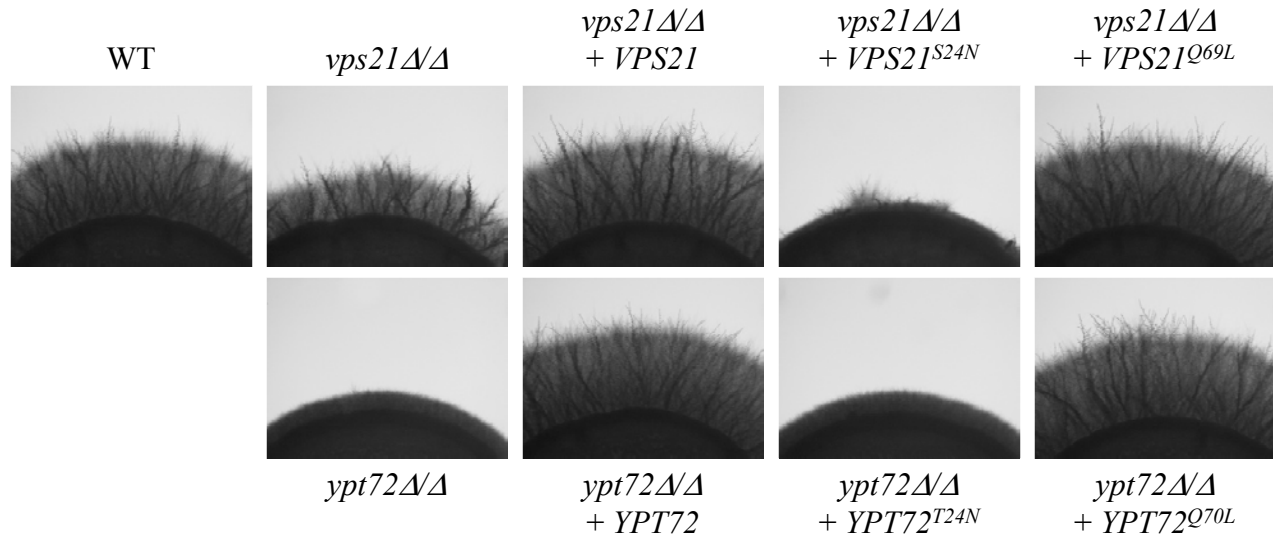

**Figure S1. Vps21p and Ypt72p Rab GTPases are required to be in their active conformation to support *C. albicans* hyphal growth.** Inactive (*VPS21<sup>S24N</sup>* and *YPT72<sup>T24N</sup>*) and active (*VPS21<sup>Q69L</sup>* and *YPT72<sup>Q70L</sup>*) conformational mutant alleles of either GTPase were introduced into their respective *vps21Δ/Δ* and *ypt72Δ/Δ* gene deletion strains. Cell suspensions of each strain were applied as spots to M199 agar and incubated at 37°C for 4 days. Similar results were found on 10% FBS agar at 37°C (data not shown). WT = YJB6284. Data representative of three independent experiments is shown.

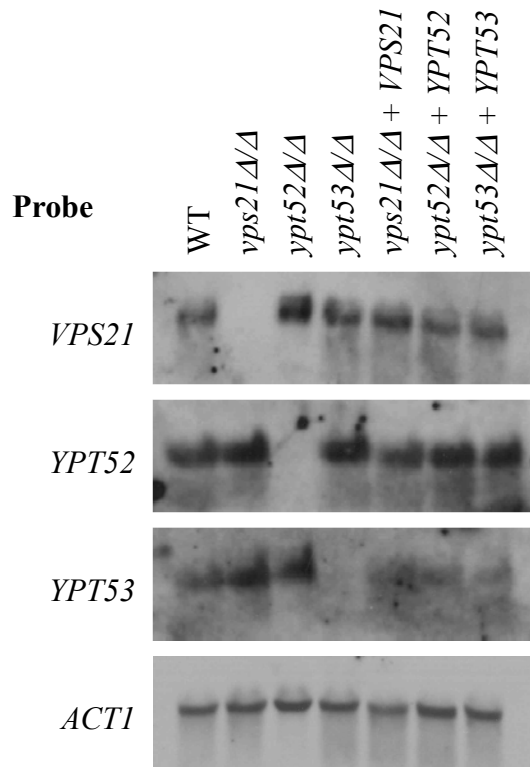

**Figure S2. Detection of *VPS21*, *YPT52* and *YPT53* transcripts.** RNA was extracted from each strain grown in YPD broth at 30°C (yeast) overnight, and subject to northern blot analysis with *VPS21*, *YPT52* and *YPT53* specific probes, or an *ACT1* probe as a loading and RNA integrity control. WT = YJB6284. Exposure times with the non-isotypic detection system were 5 minutes for *VPS21*, overnight for *YPT52* and *YPT53*, and 3 minutes for the *ACT1* probe.

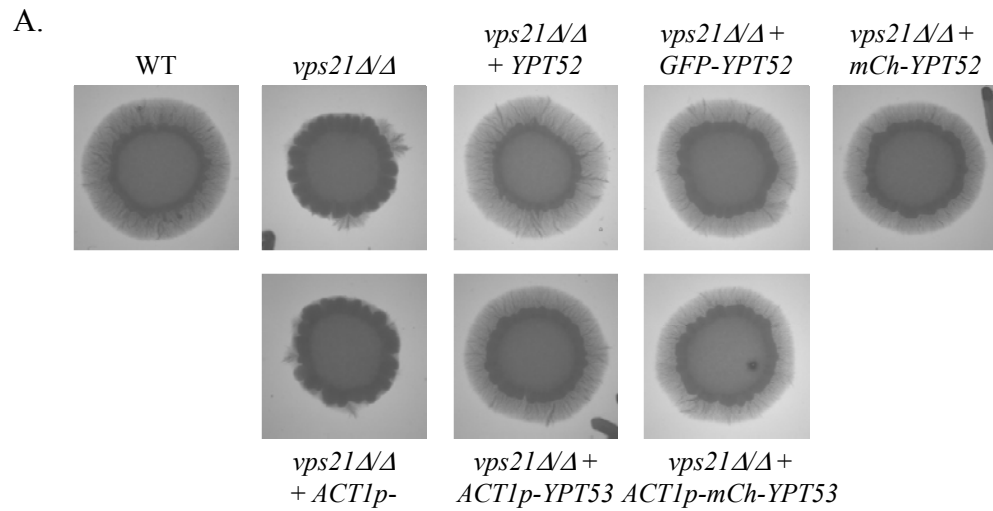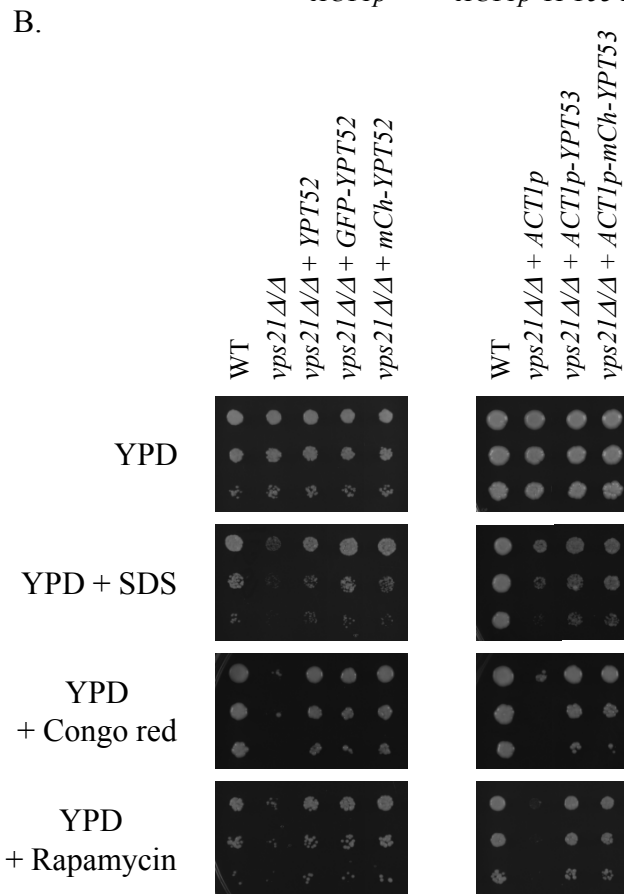

**Figure S3. Fluorescent Ypt52p and Ypt53p fusion proteins retain biological function.** (A) Cell suspensions of each strain were applied as spots to M199 agar plates and incubated at 37°C for 5 days. (B) Cell suspensions of each strain were prepared by serial dilution, applied to YPD agar or to YPD agar supplemented with 0.02% SDS, 25 μg/ml congo red or 5 nM rapamycin and incubated at 30°C for 2 days. WT = YJB6284. Each experiment was performed at least twice with similar results. Data representative of 2 independent experimental replicates is shown.

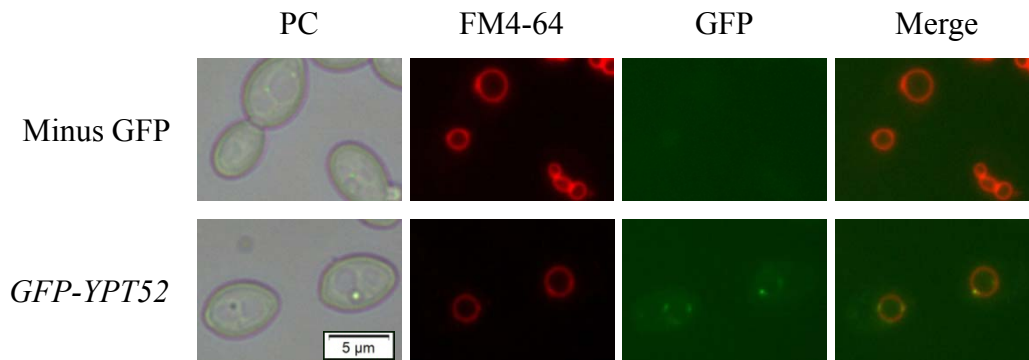

**Figure S4. Ypt52p localizes to a sub-vacuolar compartment.** A *GFP-YPT52* fusion construct was introduced into the *ypt52Δ/Δ* mutant (transcription of the *GFP-YPT52* fusion was dependent upon *YPT52* 5' and 3' UTR sequences). Each strain was pulse-chase labeled with FM4-64 to label the vacuole (red), and cells imaged using phase contrast (PC) and epifluorescence microscopy with Texas-red and FITC (green) filter sets and 100X objective. Data representative of three independent experimental replicates is shown.

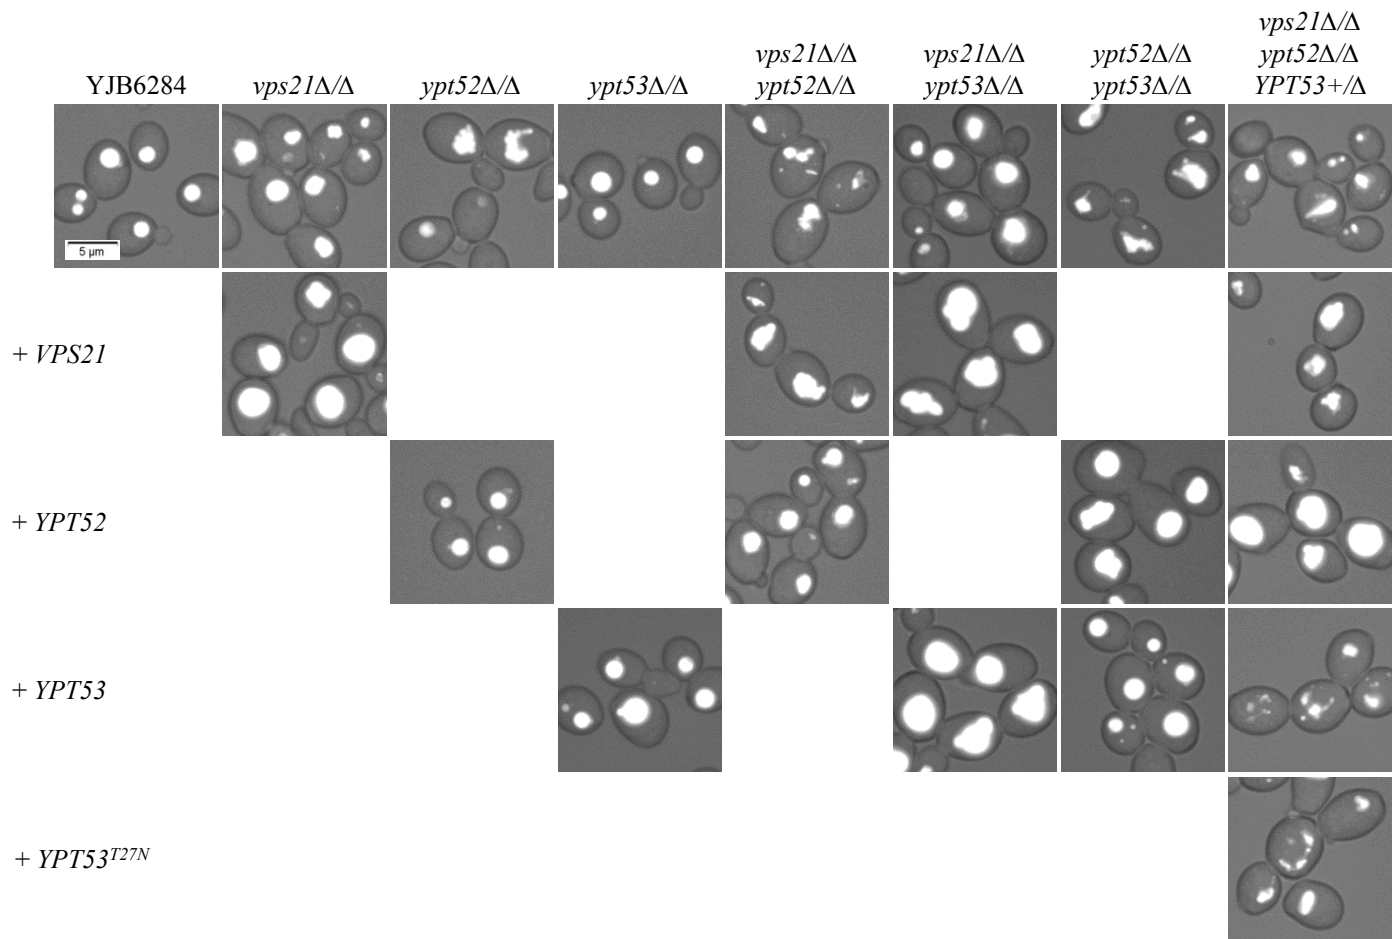

**Figure S5. Ypt52p affects vacuole morphology in *C. albicans* yeast.** Each strain was grown as yeast in YPD broth at 30°C, and vacuoles stained with CMAC. Live cells were then observed by phase contrast and epifluorescence microscopy. Merged images are shown. Data is representative of 2 or more experimental replicates for each genotype.

**Figure S6. Growth analysis of PVC GTPase mutants.** Each strain was grown in YPD broth at 30°C overnight, then sub-cultured to fresh YPD broth (pH 5.7 A, B, C; or pH 7 D, E, F) to an OD600 of 0.2, and incubated at 30°C, 180 rpm. OD600 was determined at hourly intervals. WT = strain YJB6284. Data is representative of 2 experimental replicates.

A.

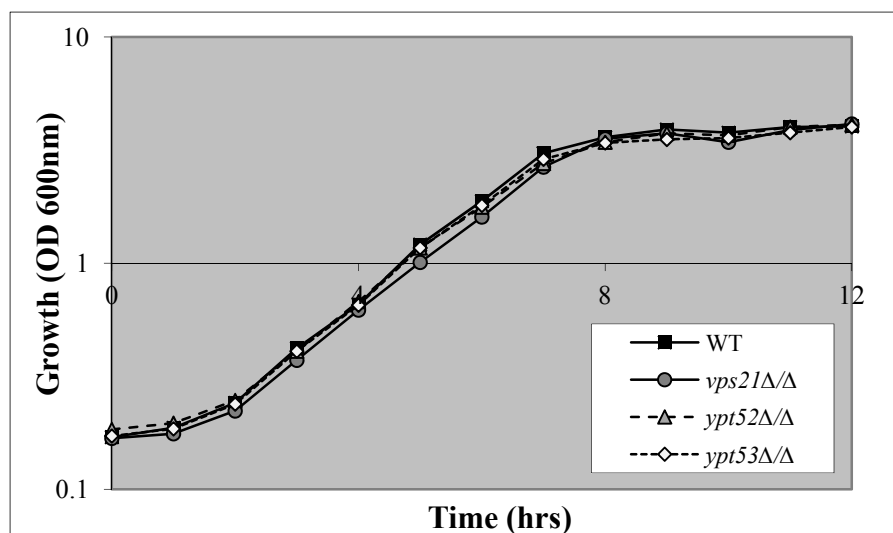

B.

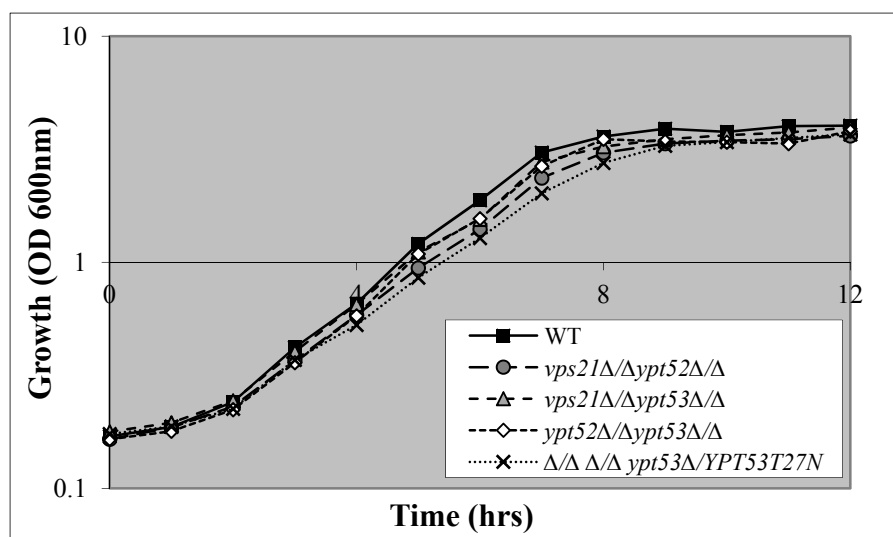

C.

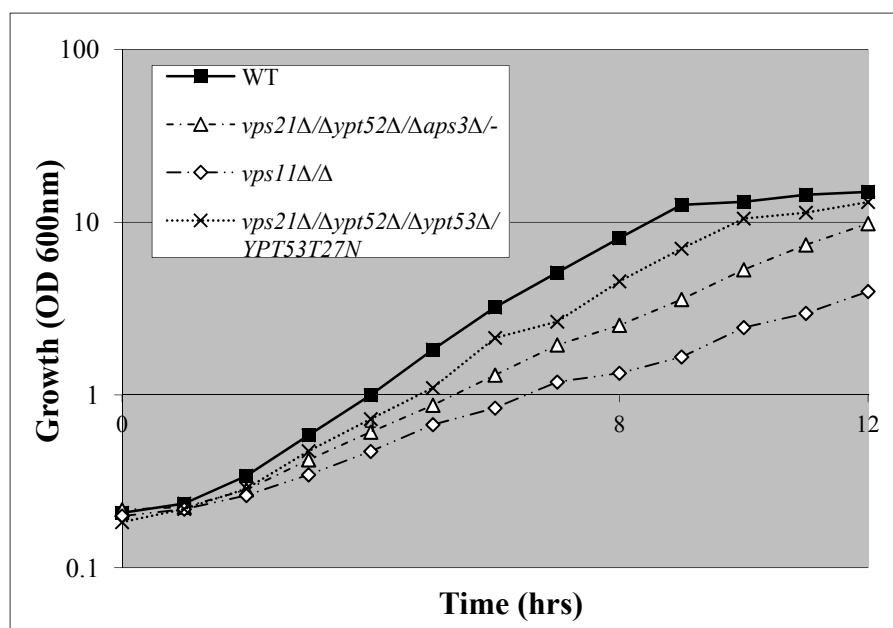

D.

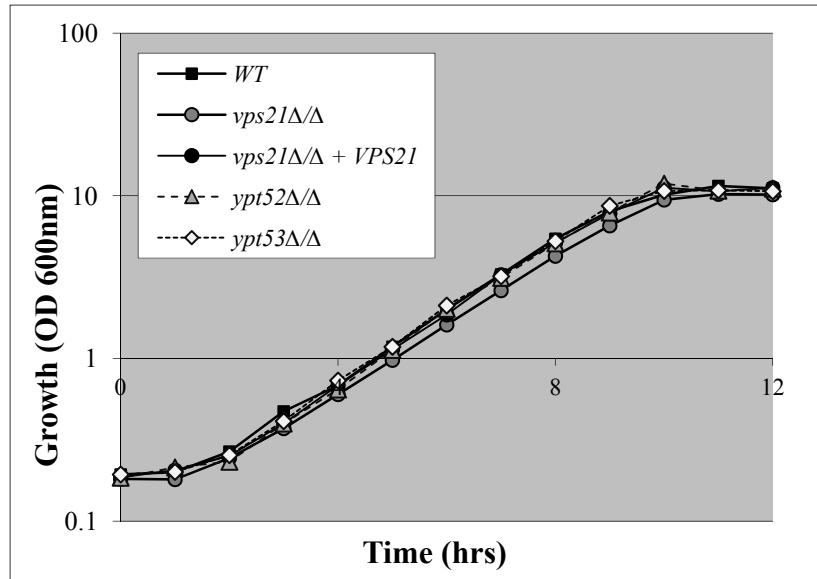

E.

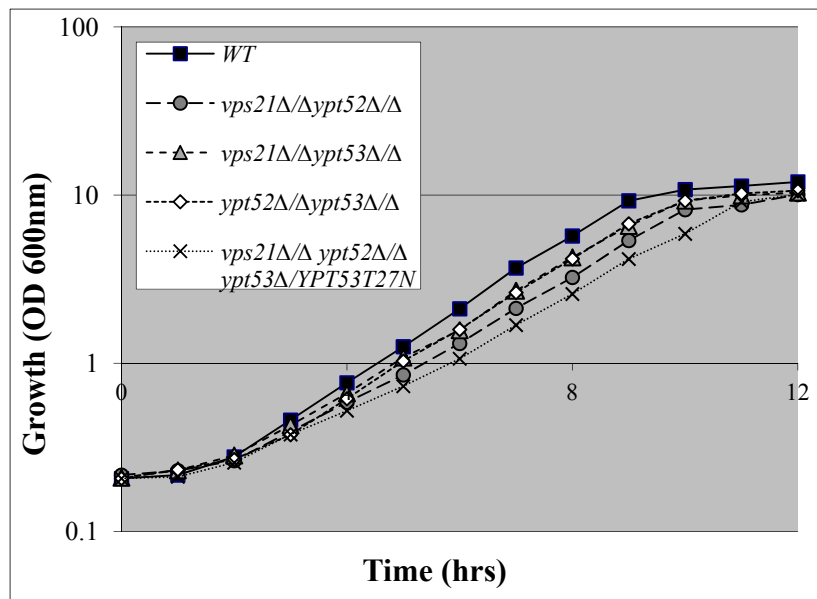

F.

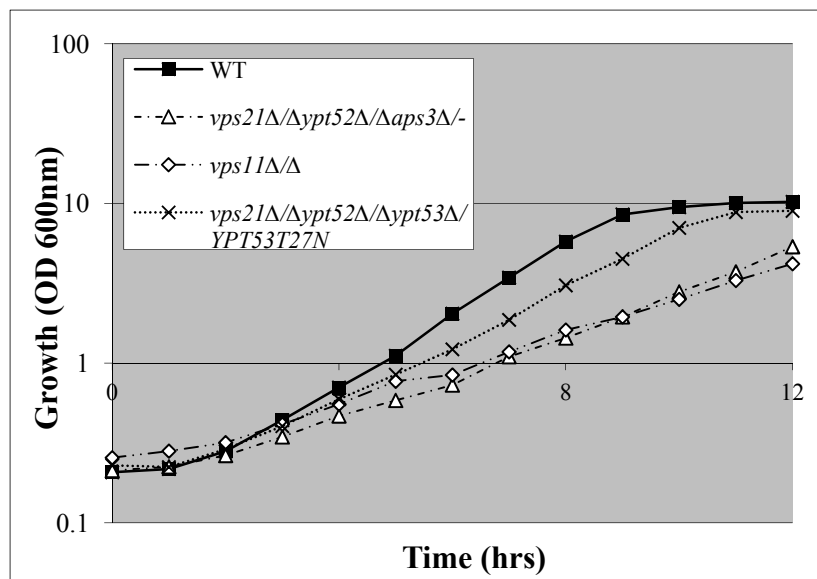

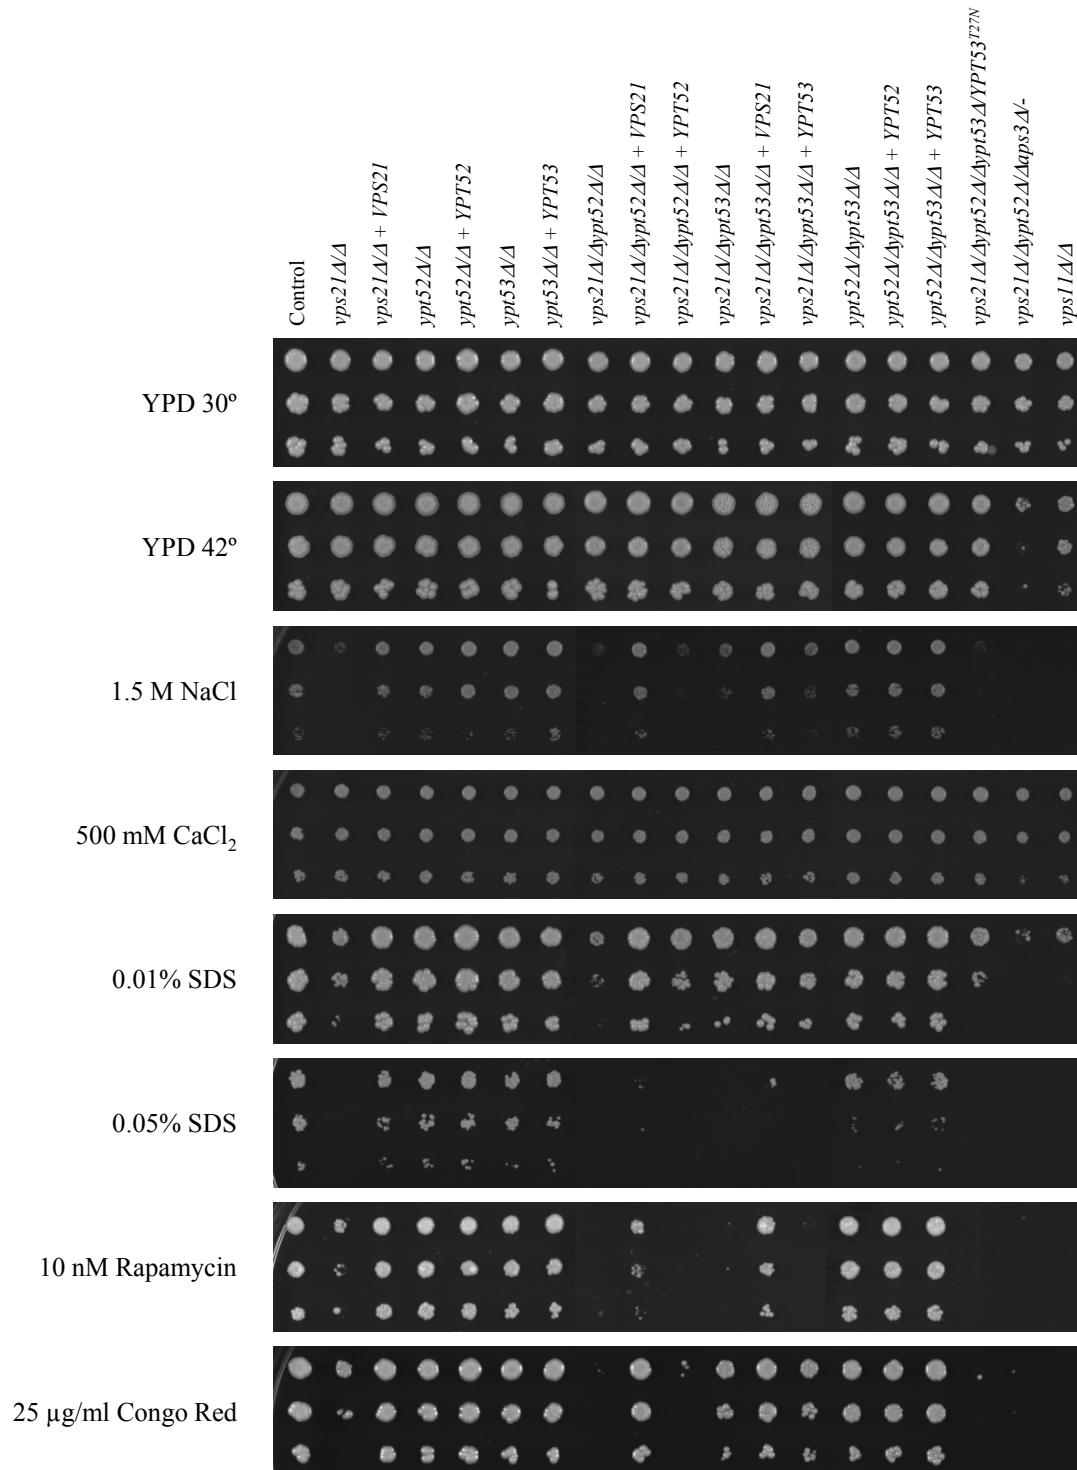

**Figure S7. Loss of *VPS21* and *YPT52* causes synthetic stress phenotypes.** Cell suspensions of each strain were prepared by serial dilution, applied to YPD agar or to YPD agar supplemented with each of the indicated stress inducing agents. Plates were incubated for 2 days at 30°C, then imaged. Data from a representative experiment are shown, and the experiment repeated with similar results.

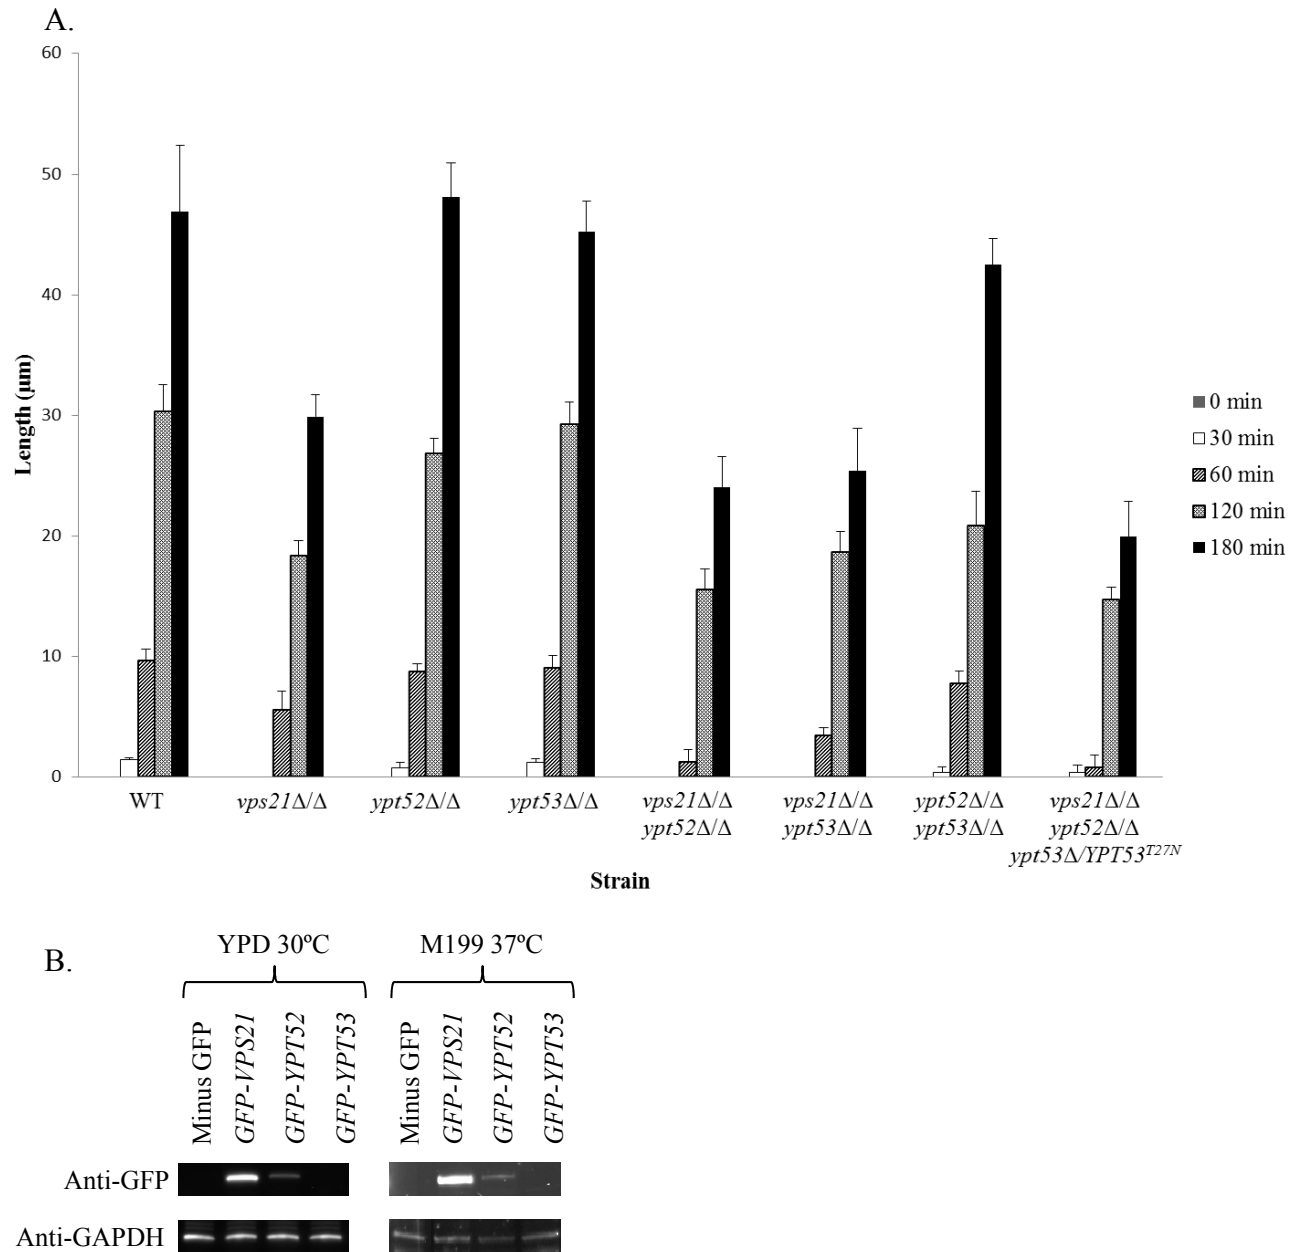

**Figure S8. *vps21Δ/Δ* and *vps21Δ/Δypt52Δ/Δ* mutants are delayed in the initiation of hyphal growth and have reduced apical extension rates.** (A) Each strain was induced to form hyphal in M199 liquid culture at 37°C. Samples taken at the indicated time points were fixed and examined microscopically. The length of individual hyphae from the base of the germ-tube neck to the hyphal apex was measured from image analysis using CellSens Dimensions™ software (Olympus). Only cells in the true hyphal form were included in the analysis, yeast or pseudohyphal forms were excluded. The mean and standard deviation of at least 10 hyphae are shown for each strain at each time point, from a representative experiment. (B) *C. albicans* strains carrying *GFP-VPS21*, *GFP-YPT52* or *GFP-YPT53* fusions with the respective genes native 5' and 3' UTR sequences were grown as yeast (YPD 30°C) or hyphae (M199 37°C) for 4 hours, extracts prepared, and immunoblotted with anti-GFP or anti-GAPDH.

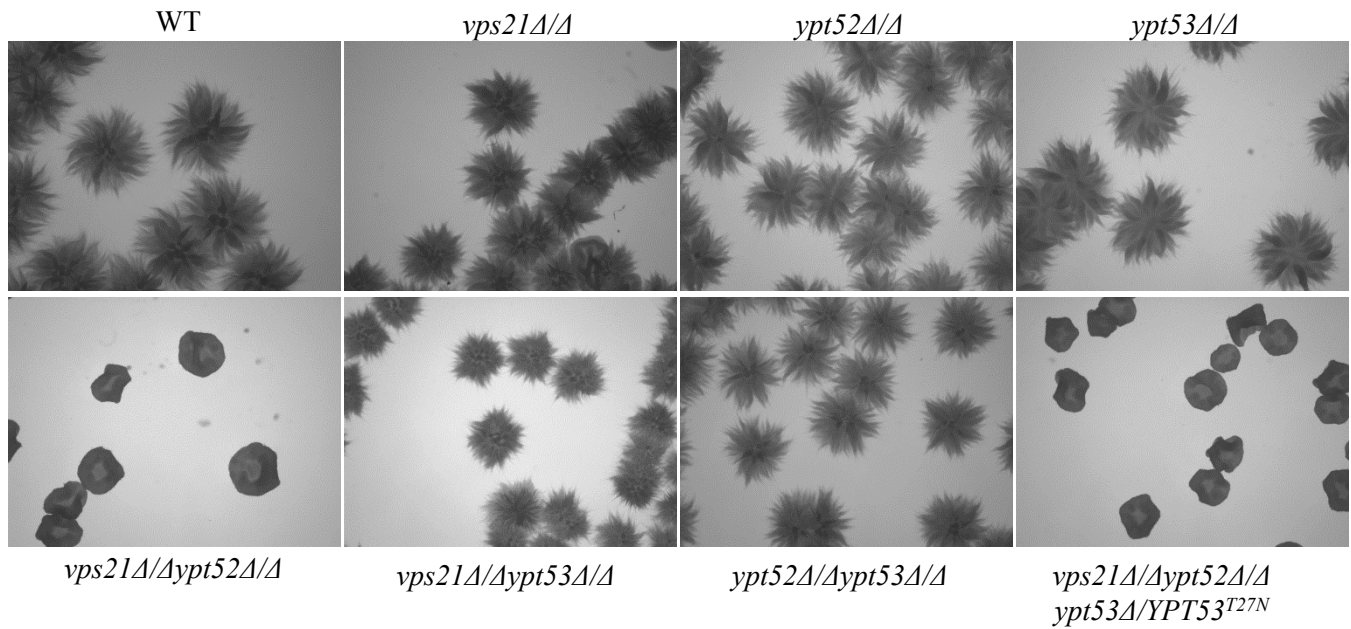

**Figure S9. Ume6p overexpression does not suppress the hyphal growth defects of the endosomal GTPase mutants.** An *ACT1-UME6* expression construct was introduced into each of the endosomal GTPase deletion mutants. Transformants of each genotype were then streaked to YPD agar and incubated at 30°C for 2 days. At least four independent transformants were examined for each GTPase mutant genotype. Representative are shown for each genotype.

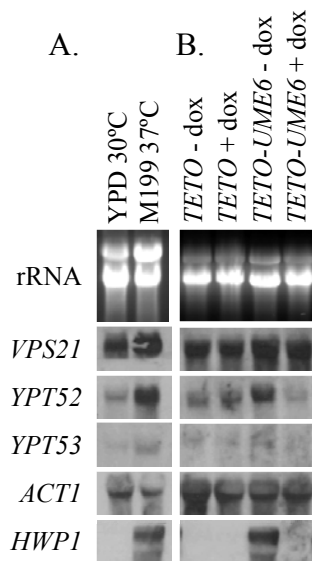

**Figure S10. PVC Rab GTPase encoding genes are transcriptionally regulated during *C. albicans* hyphal growth.** (A) *C. albicans* strain SC5314 was grown as yeast (YPD 30°) or hyphae (M199 37°C), RNA extracted, and northern analysis performed with the indicated gene specific probes. (B) *C. albicans* carrying a doxycycline repressible *TETO-UME6* construct, or an isogenic control strain carrying vector alone (*TETO*), were grown in YPD 30°C ± 1 µg/ml doxycycline for 4 hours, RNA extracted, and northern analysis performed as in part(A).

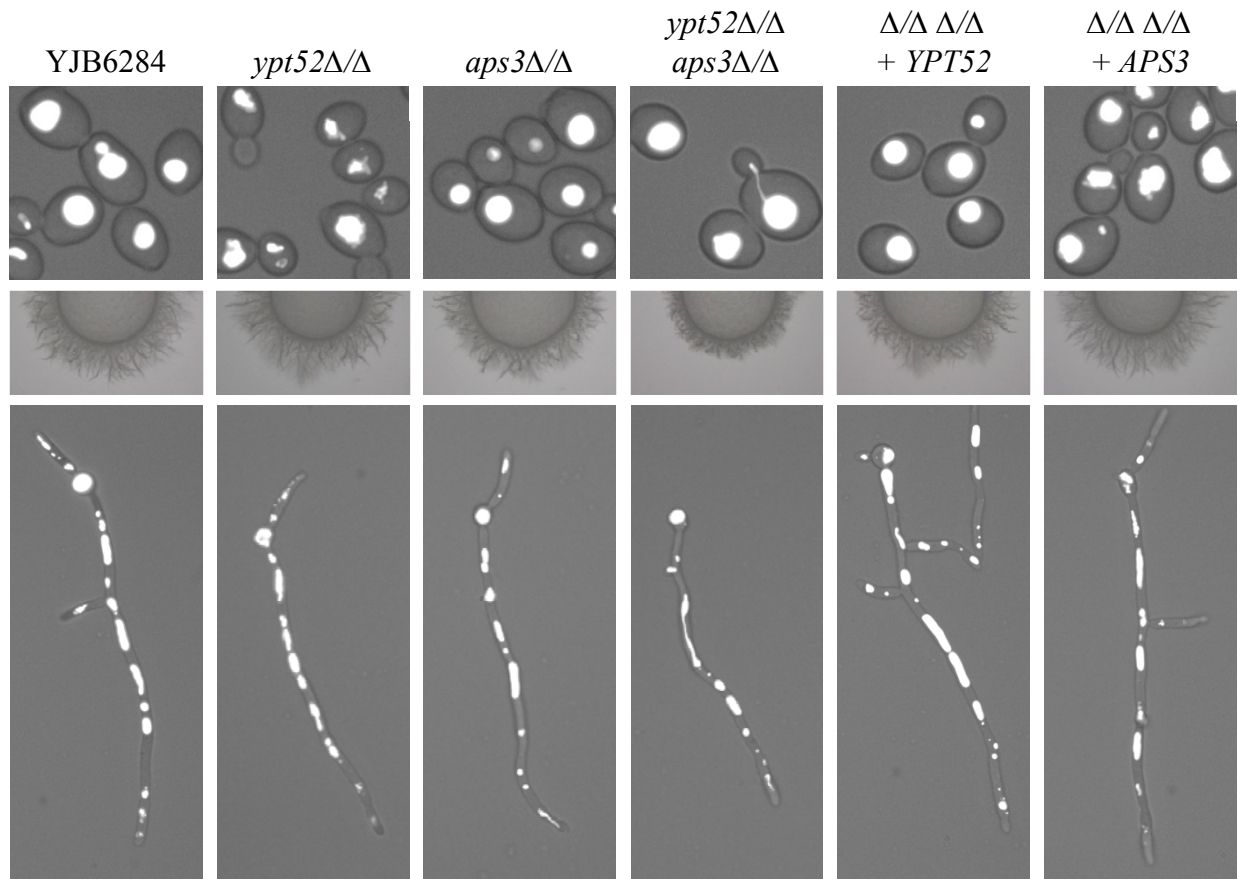

**Figure S11. Loss of Ypt52p and AP-3 mediated trafficking causes hyphal growth defects.** Vacuole morphology was determined using CMAC with yeast cells grown in YPD at 30°C (top panel), or hyphal cells grown in M199 medium at 37°C (bottom panel). Hyphal growth was also compared on 10% FBS agar (center panel).
